# Supplementary material for: Unveiling microbial dynamics in lung adenocarcinoma and adjacent nontumor tissues: insights from nicotine exposure and diverse clinical stages via nanopore sequencing technology
Source: Front Cell Infect Microbiol. 2024 Aug 27;14:1397989. doi: 10.3389/fcimb.2024.1397989 (PMC11385298; doi:10.3389/fcimb.2024.1397989)
Supplement: Supplementary file 5 [file Table5.xlsx]

## Sheet: Sheet1
SampleID	AP: mean rel. freq. (%)	AP: std. dev. (%)	ZL: mean rel. freq. (%)	ZL: std. dev. (%)	p-values	p-values (corrected)	Difference between means	95.0% lower CI	95.0% upper CI	Note	A3641760AP	A3641760AP: parent seq. count	A3641760AP: rel. freq. (%)	A3739430AP	A3739430AP: parent seq. count	A3739430AP: rel. freq. (%)	A3946367BY	A3946367BY: parent seq. count	A3946367BY: rel. freq. (%)	A4297218BY	A4297218BY: parent seq. count	A4297218BY: rel. freq. (%)	A4737600BY	A4737600BY: parent seq. count	A4737600BY: rel. freq. (%)	A4739028BY	A4739028BY: parent seq. count	A4739028BY: rel. freq. (%)	A4748312BY	A4748312BY: parent seq. count	A4748312BY: rel. freq. (%)	A4760000BY	A4760000BY: parent seq. count	A4760000BY: rel. freq. (%)	A4760756BY	A4760756BY: parent seq. count	A4760756BY: rel. freq. (%)	A4761420BY	A4761420BY: parent seq. count	A4761420BY: rel. freq. (%)	A4762457BY	A4762457BY: parent seq. count	A4762457BY: rel. freq. (%)	A4765344BY	A4765344BY: parent seq. count	A4765344BY: rel. freq. (%)	A4765635BY	A4765635BY: parent seq. count	A4765635BY: rel. freq. (%)
Genetic Information Processing | Folding, Sorting and Degradation	2.39267	0.00374066	2.39565	0.00759426	0.980142	0.980142	-0.00297588	-0.00580646	-0.000145294		0.0239393	1	2.39393	0.0239926	1	2.39926	0.0239361	1	2.39361	0.0239429	1	2.39429	0.0239281	1	2.39281	0.0239806	1	2.39806	0.0239405	1	2.39405	0.0239082	1	2.39082	0.0239116	1	2.39116	0.0239239	1	2.39239	0.0239411	1	2.39411	0.0239449	1	2.39449	0.0239559	1	2.39559
Cellular Processes | Cell Communication	0.00103465	1.0325e-05	0.00104297	2.20399e-05	0.977351	0.977351	-8.32432e-06	-1.64676e-05	-1.81018e-07		1.04e-05	1	0.00104	1.04e-05	1	0.00104	1.04e-05	1	0.00104	1.04e-05	1	0.00104	1.03e-05	1	0.00103	1.05e-05	1	0.00105	1.04e-05	1	0.00104	1.03e-05	1	0.00103	1.03e-05	1	0.00103	1.03e-05	1	0.00103	1.03e-05	1	0.00103	1.04e-05	1	0.00104	1.05e-05	1	0.00105
Cellular Processes | Cell Growth and Death	1.61022	0.00656446	1.60454	0.00778802	0.00066472	0.00066472	0.00567675	0.00229101	0.0090625		0.0160668	1	1.60668	0.0160786	1	1.60786	0.0160914	1	1.60914	0.0160685	1	1.60685	0.0160993	1	1.60993	0.0160876	1	1.60876	0.0161272	1	1.61272	0.0160965	1	1.60965	0.0161387	1	1.61387	0.0160778	1	1.60778	0.0160791	1	1.60791	0.0160738	1	1.60738	0.0160855	1	1.60855
Cellular Processes | Cell Motility	2.62149	0.00785724	2.60951	0.0374735	0.0339343	0.0339343	0.0119831	-0.00092284	0.024889		0.0262552	1	2.62552	0.0261762	1	2.61762	0.0262393	1	2.62393	0.026253	1	2.6253	0.0262452	1	2.62452	0.0262243	1	2.62243	0.0262278	1	2.62278	0.0262275	1	2.62276	0.0262223	1	2.62223	0.0262558	1	2.62558	0.0262488	1	2.62488	0.0262575	1	2.62575	0.0260904	1	2.60904
Cellular Processes | Transport and Catabolism	0.290412	0.00233001	0.289983	0.0015782	0.18147	0.18147	0.000429818	-0.000507384	0.00136702		0.00289923	1	0.289923	0.00290149	1	0.290149	0.00289794	1	0.289794	0.00290056	1	0.290056	0.00289745	1	0.289745	0.00289615	1	0.289615	0.00289978	1	0.289978	0.00290021	1	0.290021	0.00290566	1	0.290566	0.00290127	1	0.290127	0.0028994	1	0.28994	0.00289865	1	0.289865	0.00289424	1	0.289424
Environmental Information Processing | Membrane Transport	10.7791	0.0379539	10.7874	0.0554701	0.769545	0.769545	-0.00831014	-0.030691	0.0140708		0.107618	1	10.7618	0.107506	1	10.7506	0.107716	1	10.7716	0.10758	1	10.758	0.107784	1	10.7784	0.107561	1	10.7561	0.107839	1	10.7839	0.107896	1	10.7896	0.107871	1	10.787	0.107697	1	10.7697	0.10768	1	10.768	0.107605	1	10.7605	0.108139	1	10.8139
Environmental Information Processing | Signal Transduction	9.37658	0.0336066	9.36062	0.0847775	0.149513	0.149513	0.0159611	-0.0146151	0.0465374		0.0939972	1	9.39972	0.0936734	1	9.36734	0.0939016	1	9.39016	0.0939913	1	9.39913	0.0938954	1	9.38954	0.0938983	1	9.38983	0.0937571	1	9.37571	0.0937713	1	9.37713	0.0936117	1	9.36117	0.0939346	1	9.39346	0.0939303	1	9.39303	0.0939689	1	9.39689	0.0934401	1	9.34401
Environmental Information Processing | Signaling Molecules and Interaction	0.00154811	9.54019e-06	0.00155378	1.47687e-05	0.971323	0.971323	-5.67567e-06	-1.15341e-05	1.828e-07		1.56e-05	1	0.00156	1.55e-05	1	0.00155	1.55e-05	1	0.00155	1.55e-05	1	0.00155	1.55e-05	1	0.00155	1.56e-05	1	0.00156	1.55e-05	1	0.00155	1.54e-05	1	0.00154	1.55e-05	1	0.00155	1.55e-05	1	0.00155	1.55e-05	1	0.00155	1.55e-05	1	0.00155	1.56e-05	1	0.00156
Genetic Information Processing | Replication and Repair	4.28266	0.00506514	4.29389	0.0333406	0.973422	0.973422	-0.0112208	-0.0226023	0.000160688		0.0428218	1	4.28218	0.0429882	1	4.29882	0.0428166	1	4.28166	0.0428337	1	4.28337	0.0428049	1	4.28049	0.0428965	1	4.28965	0.0428422	1	4.28422	0.042779	1	4.2779	0.0428227	1	4.28227	0.0428007	1	4.28007	0.0428366	1	4.28366	0.0428318	1	4.28318	0.0429084	1	4.29084
Genetic Information Processing | Transcription	0.199684	0.000347612	0.20026	0.00167141	0.975019	0.975019	-0.000575564	-0.00115103	-1.01345e-07		0.0019968	1	0.19968	0.0020096	1	0.20096	0.00199603	1	0.199603	0.00199739	1	0.199739	0.00199534	1	0.199534	0.00200315	1	0.200315	0.00199829	1	0.199829	0.0019945	1	0.19945	0.00199777	1	0.199777	0.00199541	1	0.199541	0.00199832	1	0.199832	0.00199714	1	0.199714	0.00199938	1	0.199938
Genetic Information Processing | Translation	4.5651	0.00634769	4.57614	0.0367242	0.958205	0.958205	-0.011036	-0.0236088	0.00153684		0.0456384	1	4.56384	0.0458907	1	4.58907	0.0456392	1	4.56392	0.0456495	1	4.56495	0.0456267	1	4.56267	0.0457619	1	4.57619	0.0456858	1	4.56858	0.045588	1	4.5588	0.0456608	1	4.56608	0.0456064	1	4.56064	0.0456804	1	4.56804	0.0456505	1	4.56505	0.0457084	1	4.57084
Human Diseases | Cancers	0.189229	0.000848927	0.188538	0.00114232	0.0024303	0.0024303	0.000691153	0.000217621	0.00116468		0.00188832	1	0.188832	0.00188838	1	0.188838	0.00188964	1	0.188964	0.00188837	1	0.188837	0.00189058	1	0.189058	0.00188865	1	0.188865	0.0018932	1	0.18932	0.00189213	1	0.189213	0.00189949	1	0.189949	0.00189011	1	0.189011	0.00188907	1	0.188907	0.0018888	1	0.18888	0.00189173	1	0.189173
Human Diseases | Cardiovascular Diseases	0.00786973	3.60545e-05	0.00782811	0.000119748	0.0261346	0.0261346	4.16217e-05	-4.27443e-07	8.36708e-05		7.89e-05	1	0.00789	7.85e-05	1	0.00785	7.88e-05	1	0.00788	7.88e-05	1	0.00788	7.87e-05	1	0.00787	7.89e-05	1	0.00789	7.88e-05	1	0.00788	7.84e-05	1	0.00784	7.91e-05	1	0.00791	7.88e-05	1	0.00788	7.89e-05	1	0.00789	7.88e-05	1	0.00788	7.78e-05	1	0.00778
Human Diseases | Endocrine and Metabolic Diseases	0.0525639	0.000147956	0.0525974	0.000321546	0.71399	0.71399	-3.35537e-05	-0.000152009	8.49013e-05		0.000524543	1	0.0524543	0.000525942	1	0.0525942	0.000525444	1	0.0525444	0.0005245	1	0.05245	0.000525622	1	0.0525622	0.000525006	1	0.0525006	0.000526032	1	0.0526032	0.000525693	1	0.0525693	0.000525545	1	0.0525545	0.000524757	1	0.0524757	0.000524953	1	0.0524953	0.000524637	1	0.0524637	0.000527215	1	0.0527215
Human Diseases | Immune Diseases	0.0534298	0.000308199	0.0535959	0.000225319	0.994425	0.994425	-0.00016617	-0.000293214	-3.91263e-05		0.000536187	1	0.0536187	0.000537468	1	0.0537468	0.000534916	1	0.0534916	0.00053625	1	0.053625	0.000534223	1	0.0534223	0.000535916	1	0.0535916	0.000533419	1	0.0533419	0.00053372	1	0.053372	0.000534685	1	0.0534685	0.000535444	1	0.0535444	0.000535846	1	0.0535846	0.000536402	1	0.0536402	0.000532328	1	0.0532328
Human Diseases | Infectious Diseases	3.37186	0.0266557	3.3803	0.0139959	0.950879	0.950879	-0.00844131	-0.0184995	0.00161684		0.0338856	1	3.38856	0.0337424	1	3.37424	0.0338251	1	3.38251	0.0338659	1	3.38659	0.0337992	1	3.37992	0.0338723	1	3.38723	0.0337087	1	3.37087	0.0336954	1	3.36954	0.033558	1	3.3558	0.0338099	1	3.38099	0.0338405	1	3.38405	0.0338651	1	3.38651	0.0337381	1	3.37381
Human Diseases | Neurodegenerative Diseases	0.2296	0.000865991	0.229755	0.000551981	0.815665	0.815665	-0.000155012	-0.000497252	0.000187227		0.0023015	1	0.23015	0.00229886	1	0.229886	0.00229899	1	0.229899	0.00230071	1	0.230071	0.00229771	1	0.229771	0.00230383	1	0.230383	0.00229719	1	0.229719	0.00229332	1	0.229332	0.0022922	1	0.22922	0.00229818	1	0.229818	0.00229943	1	0.229943	0.00230115	1	0.230115	0.00229399	1	0.229399
Human Diseases | Substance Dependence	0.0255069	0.0002183	0.0253012	0.000407488	0.00498791	0.00498791	0.000205635	5.12365e-05	0.000360034		0.000253931	1	0.0253931	0.000253125	1	0.0253125	0.000255139	1	0.0255139	0.000254134	1	0.0254134	0.000255428	1	0.0255428	0.000253185	1	0.0253185	0.00025491	1	0.025491	0.000255381	1	0.0255381	0.00025608	1	0.025608	0.000254409	1	0.0254409	0.000254492	1	0.0254492	0.000254212	1	0.0254212	0.000253923	1	0.0253923
Metabolism | Amino Acid Metabolism	11.5462	0.0103588	11.5389	0.0182824	0.020329	0.020329	0.007336	0.000322869	0.0143491		0.115429	1	11.5429	0.115339	1	11.5339	0.115435	1	11.5435	0.115424	1	11.5424	0.115434	1	11.5434	0.115383	1	11.5383	0.115449	1	11.5449	0.115496	1	11.5496	0.115553	1	11.5553	0.115488	1	11.5488	0.115423	1	11.5423	0.115429	1	11.5429	0.115439	1	11.5439
Metabolism | Biosynthesis of Other Secondary Metabolites	0.79167	0.00398269	0.790166	0.00170367	0.0212546	0.0212546	0.00150392	5.2894e-05	0.00295495		0.00789756	1	0.789756	0.00790212	1	0.790213	0.00790002	1	0.790002	0.00789913	1	0.789913	0.00789943	1	0.789943	0.00788479	1	0.788479	0.0079087	1	0.79087	0.00791036	1	0.791036	0.00794811	1	0.794811	0.00790487	1	0.790487	0.00790061	1	0.790061	0.00789947	1	0.789947	0.00788785	1	0.788785
Metabolism | Carbohydrate Metabolism	12.6651	0.0190892	12.6719	0.0339195	0.849944	0.849944	-0.00678381	-0.0197752	0.0062076		0.12659	1	12.659	0.126637	1	12.6637	0.126603	1	12.6603	0.126597	1	12.6597	0.126589	1	12.6589	0.126537	1	12.6537	0.126581	1	12.6581	0.126592	1	12.6592	0.126675	1	12.6675	0.126572	1	12.6572	0.126602	1	12.6602	0.126614	1	12.6614	0.126638	1	12.6638
Metabolism | Energy Metabolism	6.95893	0.00344375	6.94866	0.0287818	0.02015	0.02015	0.0102675	0.000478894	0.0200562		0.0695806	1	6.95806	0.0695922	1	6.95922	0.0695915	1	6.95915	0.0695866	1	6.95866	0.0696097	1	6.96097	0.069617	1	6.9617	0.0696175	1	6.96175	0.0696395	1	6.96395	0.0695559	1	6.95559	0.0695937	1	6.95937	0.0695724	1	6.95724	0.0695753	1	6.95753	0.0695788	1	6.95788
Metabolism | Glycan Biosynthesis and Metabolism	2.7725	0.00882564	2.77653	0.0167315	0.896686	0.896686	-0.00402948	-0.0103488	0.00228985		0.027718	1	2.7718	0.0277719	1	2.77719	0.0277159	1	2.77159	0.0277315	1	2.77315	0.0277036	1	2.77036	0.0277325	1	2.77325	0.0277104	1	2.77104	0.0276725	1	2.76725	0.0277134	1	2.77134	0.0276929	1	2.76929	0.0277105	1	2.77105	0.0277329	1	2.77329	0.027736	1	2.7736
Metabolism | Lipid Metabolism	3.59918	0.00448369	3.59977	0.00253028	0.752761	0.752761	-0.000590036	-0.0023084	0.00112832		0.0359975	1	3.59975	0.0359772	1	3.59772	0.0359957	1	3.59957	0.0359921	1	3.59921	0.0359901	1	3.59901	0.0359764	1	3.59764	0.0359758	1	3.59758	0.035994	1	3.5994	0.0359744	1	3.59744	0.0360006	1	3.60006	0.0359906	1	3.59906	0.0359887	1	3.59887	0.0359528	1	3.59528
Metabolism | Metabolism of Cofactors and Vitamins	6.8896	0.00233822	6.88675	0.0098362	0.0489571	0.0489571	0.00285548	-0.000549984	0.00626095		0.0688948	1	6.88948	0.0689148	1	6.89148	0.068914	1	6.8914	0.068902	1	6.8902	0.0689083	1	6.89083	0.0689336	1	6.89336	0.068916	1	6.8916	0.0688955	1	6.88955	0.0688801	1	6.88801	0.0688983	1	6.88983	0.0688954	1	6.88954	0.0689096	1	6.89096	0.0689432	1	6.89432
Metabolism | Metabolism of Other Amino Acids	2.5758	0.00230635	2.57565	0.00194485	0.387802	0.387802	0.000143884	-0.000858953	0.00114672		0.0257461	1	2.57461	0.0257385	1	2.57385	0.0257489	1	2.57489	0.0257441	1	2.57441	0.0257467	1	2.57467	0.0257432	1	2.57432	0.0257554	1	2.57554	0.0257516	1	2.57516	0.0257867	1	2.57867	0.0257538	1	2.57538	0.0257485	1	2.57485	0.0257538	1	2.57538	0.0257774	1	2.57774
Metabolism | Metabolism of Terpenoids and Polyketides	2.47217	0.00296396	2.47274	0.00602307	0.692079	0.692079	-0.000564727	-0.00280931	0.00167985		0.0247242	1	2.47242	0.024733	1	2.4733	0.024722	1	2.4722	0.0247222	1	2.47222	0.0247204	1	2.47204	0.024691	1	2.4691	0.0246911	1	2.46911	0.0247741	1	2.47741	0.0247006	1	2.47006	0.0247413	1	2.47413	0.0247062	1	2.47062	0.0247024	1	2.47024	0.0247002	1	2.47002
Metabolism | Nucleotide Metabolism	5.18061	0.00490286	5.1902	0.0341865	0.947937	0.947937	-0.00958745	-0.0212453	0.00207038		0.0517787	1	5.17787	0.0519178	1	5.19178	0.0517885	1	5.17885	0.0517881	1	5.17881	0.0517814	1	5.17814	0.0518573	1	5.18573	0.0518261	1	5.18261	0.0517688	1	5.17688	0.0518304	1	5.18304	0.0517607	1	5.17607	0.0517897	1	5.17897	0.0517942	1	5.17942	0.0518871	1	5.18871
Metabolism | Xenobiotics Biodegradation and Metabolism	3.53803	0.0134205	3.53095	0.0179628	0.0312096	0.0312096	0.00708213	-0.000377875	0.0145421		0.0353157	1	3.53157	0.035281	1	3.5281	0.0353259	1	3.53259	0.0353168	1	3.53168	0.035347	1	3.5347	0.0352477	1	3.52477	0.0353398	1	3.53398	0.0354555	1	3.54555	0.0354594	1	3.54594	0.0353885	1	3.53885	0.0353197	1	3.53197	0.0352955	1	3.52955	0.0353269	1	3.53269
Organismal Systems | Circulatory System	0.0141479	5.62574e-05	0.0141177	0.000104124	0.0656067	0.0656067	3.0219e-05	-9.30493e-06	6.97429e-05		0.000141463	1	0.0141463	0.000141866	1	0.0141866	0.000141184	1	0.0141184	0.000141557	1	0.0141557	0.000141234	1	0.0141234	0.000142031	1	0.0142031	0.000141927	1	0.0141927	0.000141549	1	0.0141549	0.000141922	1	0.0141922	0.000141666	1	0.0141666	0.000141359	1	0.0141359	0.000141508	1	0.0141508	0.000141359	1	0.0141359
Organismal Systems | Digestive System	0.141702	0.000927327	0.141332	0.0004868	0.0192252	0.0192252	0.000370314	2.04162e-05	0.000720213		0.00141426	1	0.141426	0.00143014	1	0.143014	0.0014123	1	0.14123	0.00141701	1	0.141701	0.00141033	1	0.141034	0.00141395	1	0.141395	0.00141338	1	0.141338	0.00141091	1	0.141091	0.00142574	1	0.142574	0.00141334	1	0.141334	0.00141557	1	0.141557	0.00141554	1	0.141554	0.00139977	1	0.139977
Organismal Systems | Endocrine System	0.350685	0.000844615	0.350829	0.00104935	0.738389	0.738389	-0.000144057	-0.000591952	0.000303837		0.00351168	1	0.351168	0.00351411	1	0.351411	0.00350831	1	0.350831	0.0035129	1	0.35129	0.00350759	1	0.350759	0.00350621	1	0.350621	0.00350208	1	0.350208	0.00351055	1	0.351055	0.00350506	1	0.350506	0.00351123	1	0.351123	0.00350895	1	0.350895	0.00351061	1	0.351061	0.00350329	1	0.350329
Organismal Systems | Environmental Adaptation	0.273471	0.000679377	0.273681	0.000607214	0.91521	0.91521	-0.000210733	-0.000513534	9.20675e-05		0.00273853	1	0.273853	0.00274029	1	0.27403	0.00273608	1	0.273608	0.00273867	1	0.273867	0.00273494	1	0.273494	0.00274295	1	0.274295	0.00273799	1	0.273799	0.00273045	1	0.273045	0.00273468	1	0.273467	0.00273577	1	0.273577	0.00273854	1	0.273854	0.00273929	1	0.273929	0.00273691	1	0.273691
Organismal Systems | Excretory System	0.0186177	4.14049e-05	0.01861	6.30284e-05	0.272587	0.272587	7.64606e-06	-1.74767e-05	3.27689e-05		0.000186335	1	0.0186335	0.000187355	1	0.0187355	0.00018587	1	0.018587	0.000186454	1	0.0186454	0.000185815	1	0.0185815	0.000187008	1	0.0187008	0.000186401	1	0.0186401	0.000186367	1	0.0186367	0.000186665	1	0.0186665	0.000186099	1	0.0186099	0.000186064	1	0.0186064	0.000186408	1	0.0186408	0.000185144	1	0.0185144
Organismal Systems | Immune System	0.0552454	0.000190033	0.0554151	0.000686451	0.919811	0.919811	-0.000169686	-0.000409344	6.99714e-05		0.000552011	1	0.0552011	0.000556878	1	0.0556878	0.000550478	1	0.0550478	0.00055255	1	0.055255	0.000550063	1	0.0550063	0.000554922	1	0.0554922	0.000552911	1	0.0552911	0.000550625	1	0.0550625	0.000555792	1	0.0555792	0.00055103	1	0.055103	0.000551238	1	0.0551238	0.000552204	1	0.0552204	0.000549574	1	0.0549574
Organismal Systems | Nervous System	0.105804	0.000329129	0.105381	0.000831119	0.00338438	0.00338438	0.000422095	0.000122378	0.000721813		0.00105659	1	0.105659	0.0010577	1	0.10577	0.00105678	1	0.105678	0.00105655	1	0.105655	0.00105698	1	0.105698	0.00105677	1	0.105677	0.00105889	1	0.105889	0.00105845	1	0.105845	0.0010607	1	0.10607	0.00105694	1	0.105694	0.00105614	1	0.105614	0.00105652	1	0.105652	0.00105424	1	0.105424
Organismal Systems | Sensory System	1.80741e-09	2.18876e-09	2.51822e-09	1.9205e-09	0.926278	0.926278	-7.10811e-10	-1.67854e-09	2.56922e-10		2.45e-11	1	2.45e-09	3.03e-11	1	3.03e-09	1.41e-11	1	1.41e-09	9.98e-12	1	9.98e-10	9.48e-12	1	9.48e-10	0	1	0	3.87e-12	1	3.87e-10	4.27e-11	1	4.27e-09	8.16e-12	1	8.16e-10	1.89e-11	1	1.89e-09	3.78e-12	1	3.78e-10	0	1	0	1.11e-11	1	1.11e-09
[truncated: 183 more columns]
